# Supplementary material for: Synthesis and Quantum Transport Properties of Bi2Se3 Topological Insulator Nanostructures
Source: PubMed Central journal article supplement — Sci Rep. 2013 Feb 12;3:1264. doi: 10.1038/srep01264 (PMC3569629; doi:10.1038/srep01264), 2013-02-12
Supplement: srep01264-s1.pdf [file srep01264-s1.pdf]

# **Controllable Synthesis and Quantum Transport Properties of $\text{Bi}_2\text{Se}_3$ Topological Insulator Nanostructures**

Yuan Yan<sup>1</sup>, Zhi-Min Liao<sup>1,\*</sup>, Yang-Bo Zhou<sup>1</sup>, Han-Chun Wu<sup>2</sup>, Ya-Qing Bie<sup>1</sup>,  
Jing-Jing Chen<sup>1</sup>, Jie Meng<sup>1</sup>, Xiao-Song Wu<sup>1</sup>, and Da-Peng Yu<sup>1</sup>

<sup>1</sup>State Key Laboratory for Mesoscopic Physics, Department of Physics,  
Peking University, Beijing 100871, P.R. China

<sup>2</sup>CRANN and School of Physics, Trinity College Dublin, Dublin 2, Ireland

\*Correspondence and requests for materials should be addressed to Z.M.L.

([liaozm@pku.edu.cn](mailto:liaozm@pku.edu.cn))

## Supporting Information

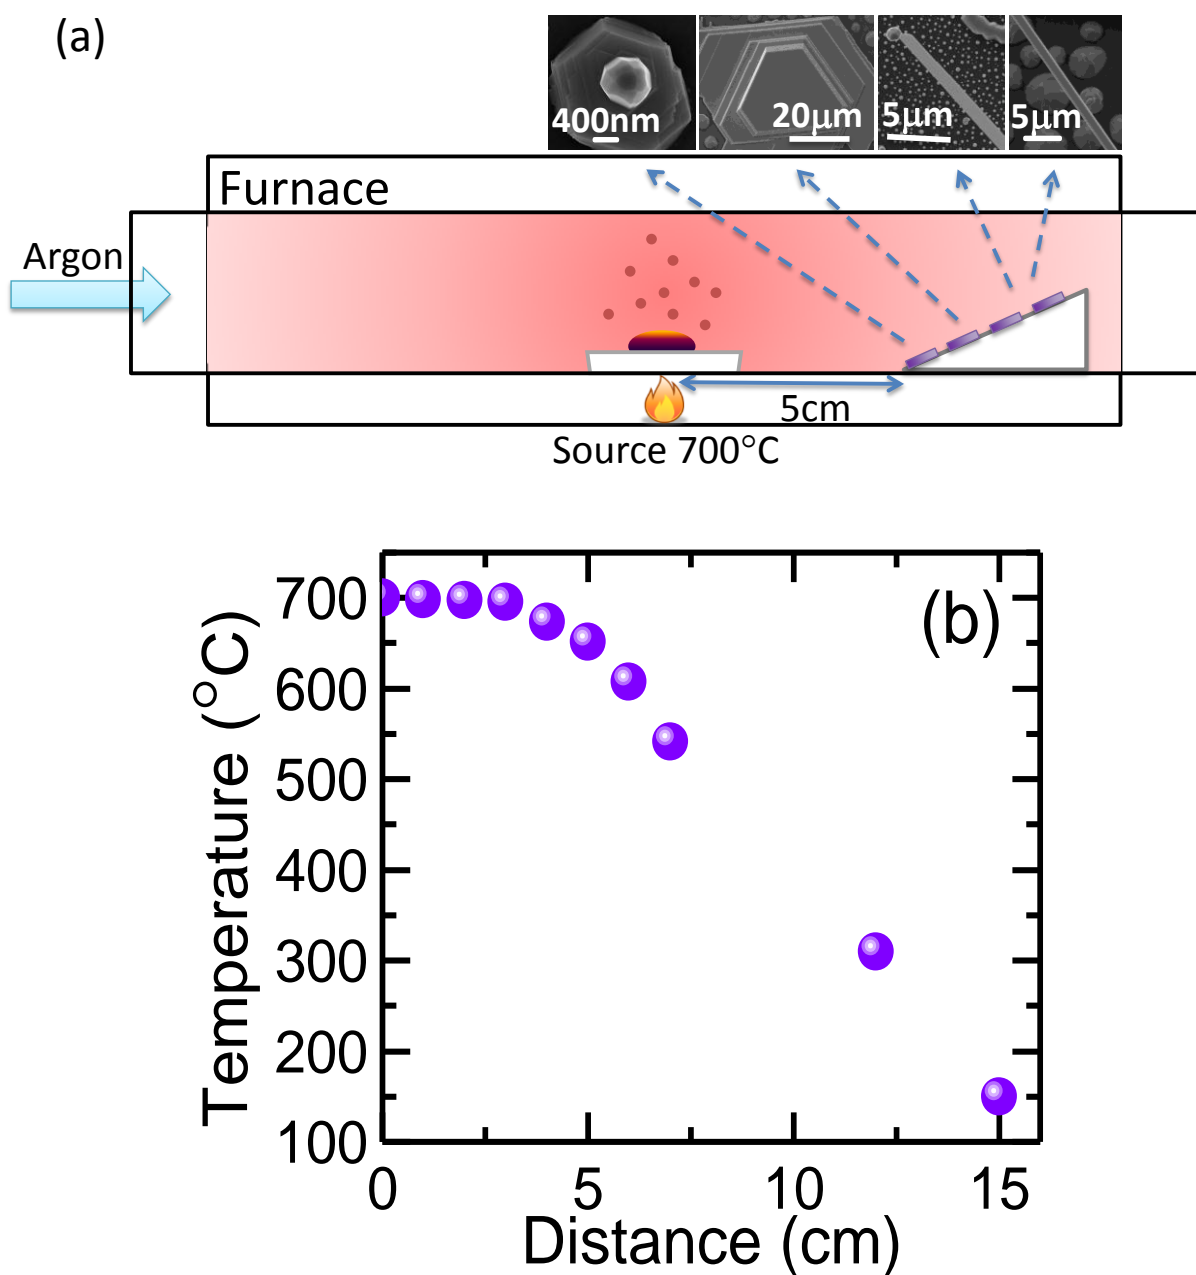

**Figure S1.** (a) Schematic diagram of the tube furnace and the CVD method.  $\text{Bi}_2\text{Se}_3$  powders were placed in the center of the tube and used as source materials. Silicon substrates with electron beam evaporated gold thin layer were placed downstream of the source with an angle of about 30 degree to the horizontal to collect the products. The  $\text{Bi}_2\text{Se}_3$  nanostructures with different morphologies were obtained at the substrates away from the source with different distances. (b) The temperature distribution in the furnace relative to the central temperature of 700 °C.

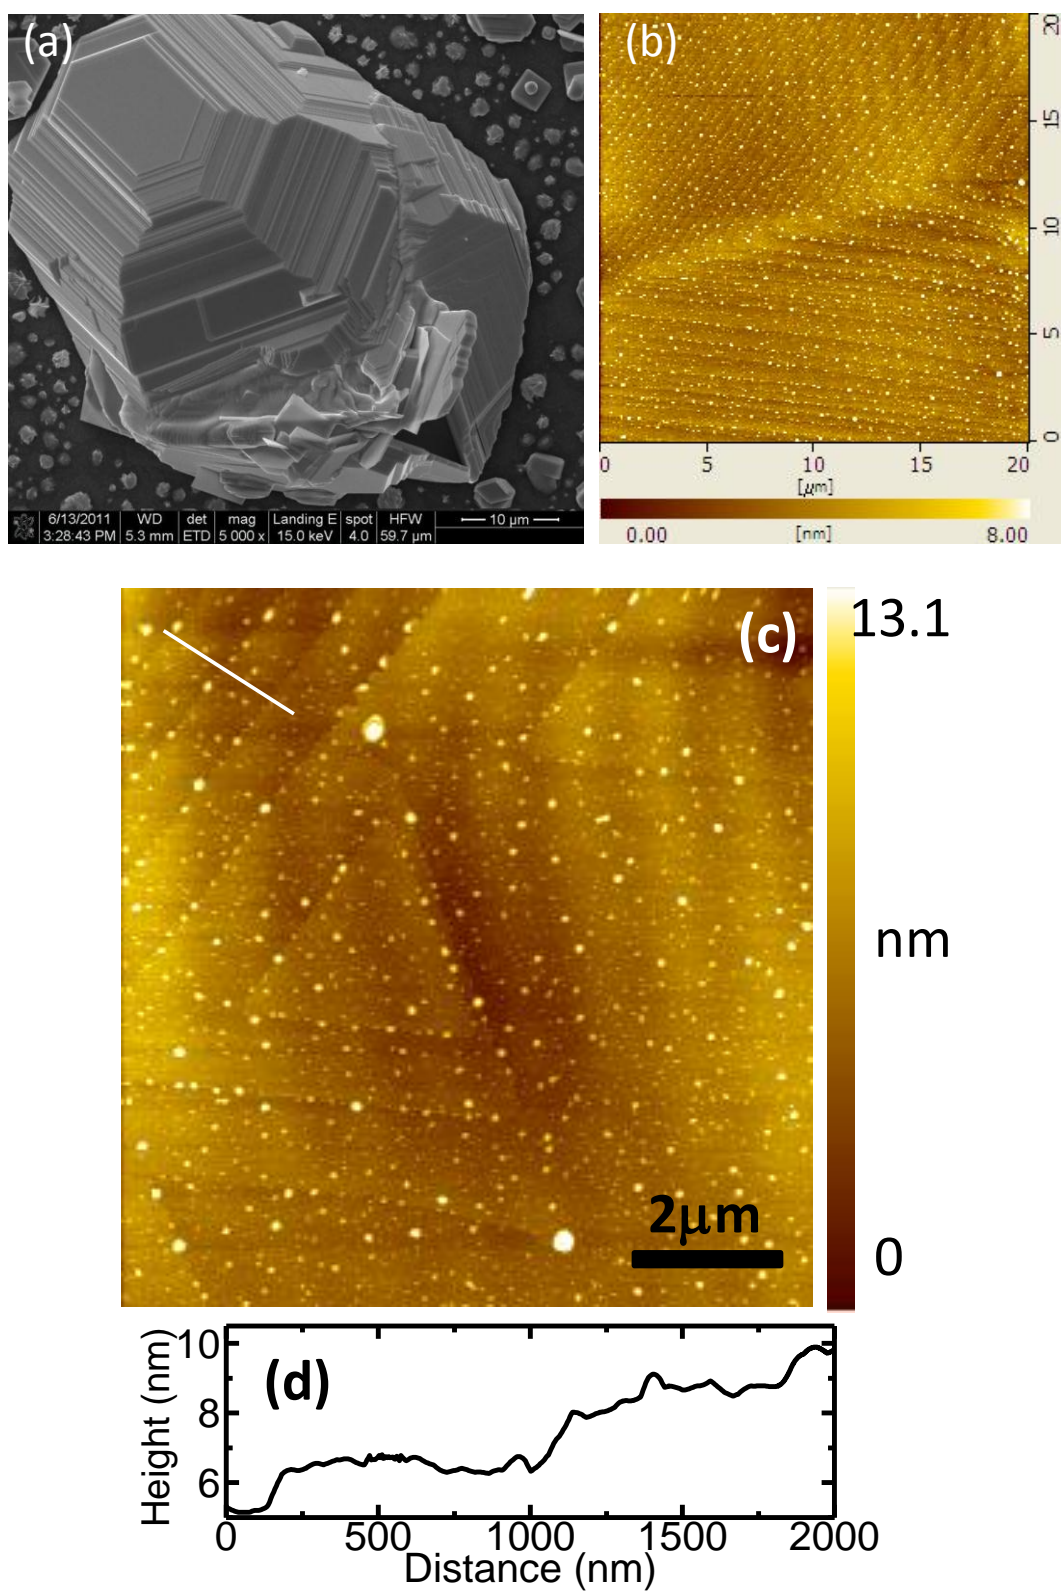

**Figure S2.** (a) SEM image shows the layered character of the synthesized  $\text{Bi}_2\text{Se}_3$  nano-structures. (b,c) AFM images show the spirals of  $\text{Bi}_2\text{Se}_3$  nano-plate. (d) The AFM line profile analysis shows the step height  $\sim 1$  nm.

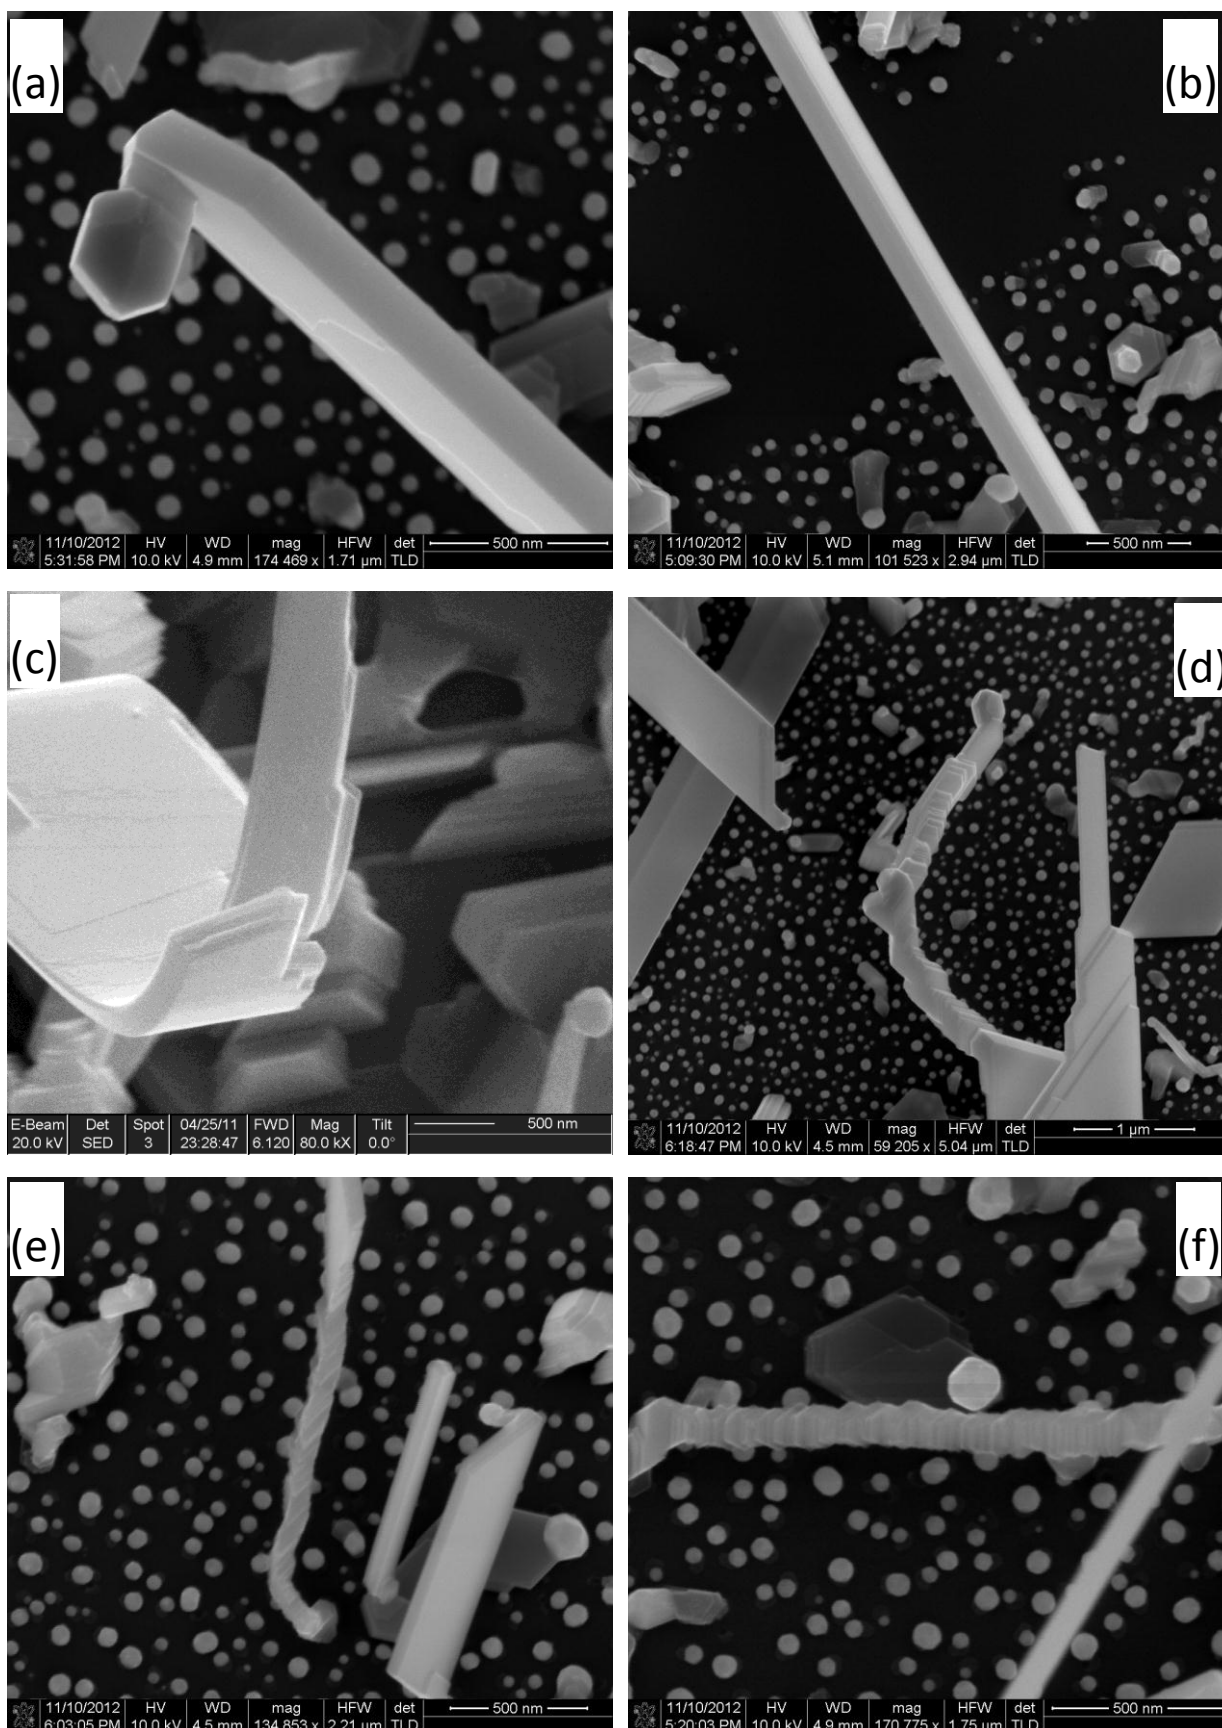

**Figure S3.** SEM images of the as grown  $\text{Bi}_2\text{Se}_3$  nanostructures.

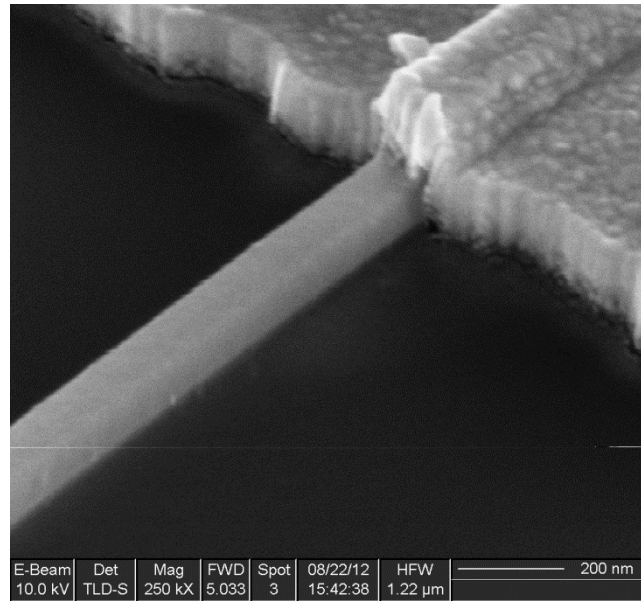

**Figure S4.** SEM image of a typical nanobeam device as the sample stage was tilted 52°.

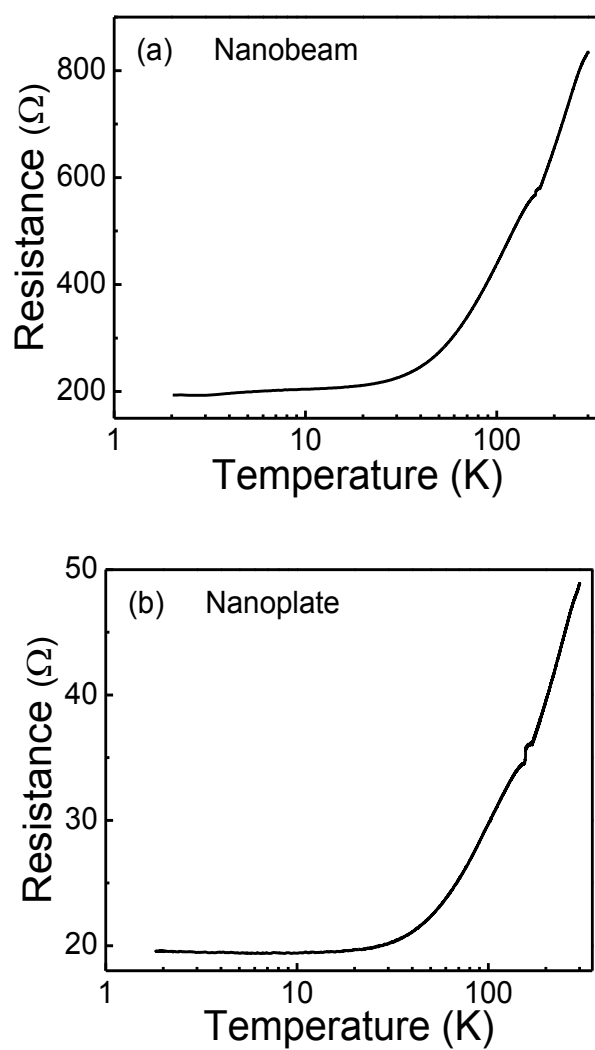

**Figure S5.** The temperature dependent resistance of (a)  $\text{Bi}_2\text{Se}_3$  nanobeam and (b)  $\text{Bi}_2\text{Se}_3$  nanoplate.

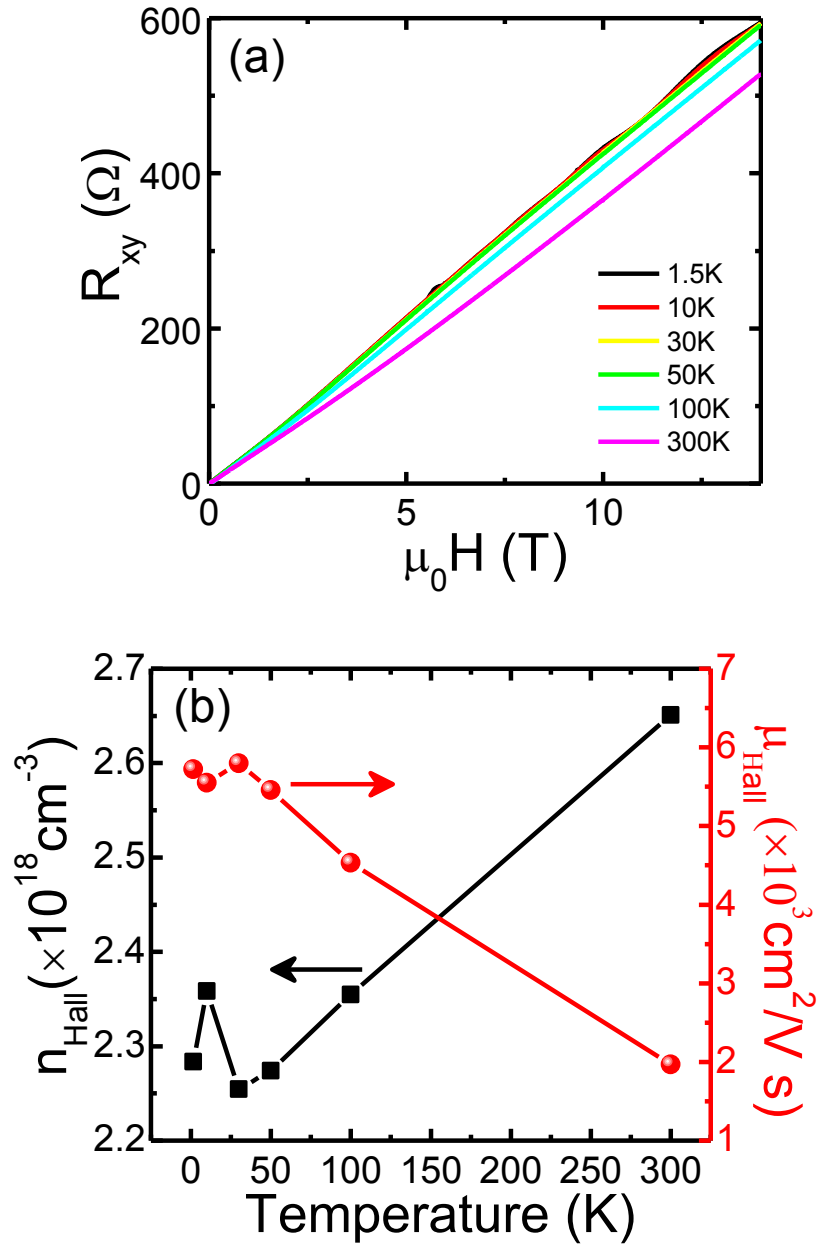

**Figure S6.** (a) The  $R_{xy}$  of nanoplate as a function of magnetic field at different temperatures. By fitting the  $R_{xy}$ -B curves in low field region ( $<1$  T), the carrier concentration  $n_{Hall}$  and Hall mobility  $\mu_{Hall}$  as a function of temperature are plotted in (b).

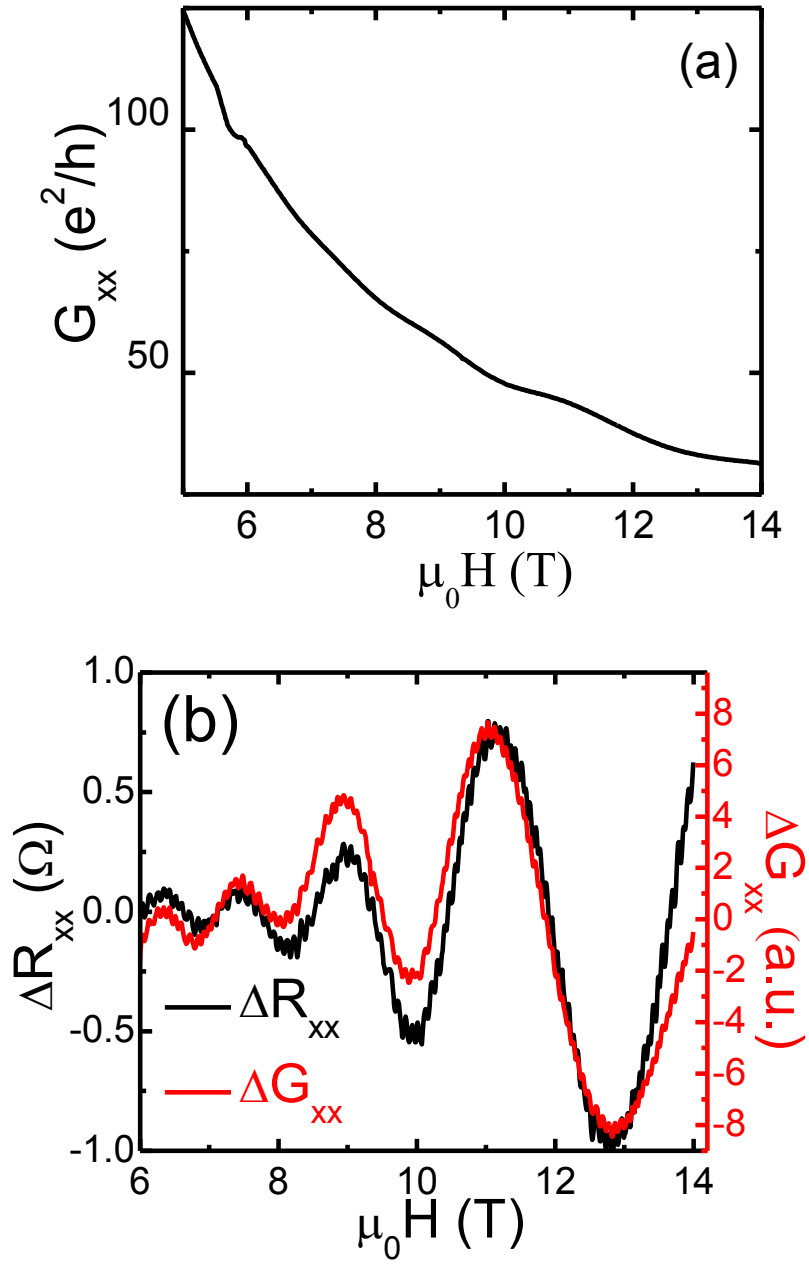

**Figure S7.** (a) The  $G_{xx}$  (obtained from  $G_{xx} = R_{xx}/[R_{xx}^2 + R_{xy}^2]$ ) of the  $\text{Bi}_2\text{Se}_3$  nanoplate as a function of magnetic field. (b) The SdH oscillations were represented as  $\Delta G_{xx} \sim B$  and  $\Delta R_{xx} \sim B$ , respectively. The minima in  $G_{xx}$  are well consistent with the minima in  $R_{xx}$  at high magnetic field.

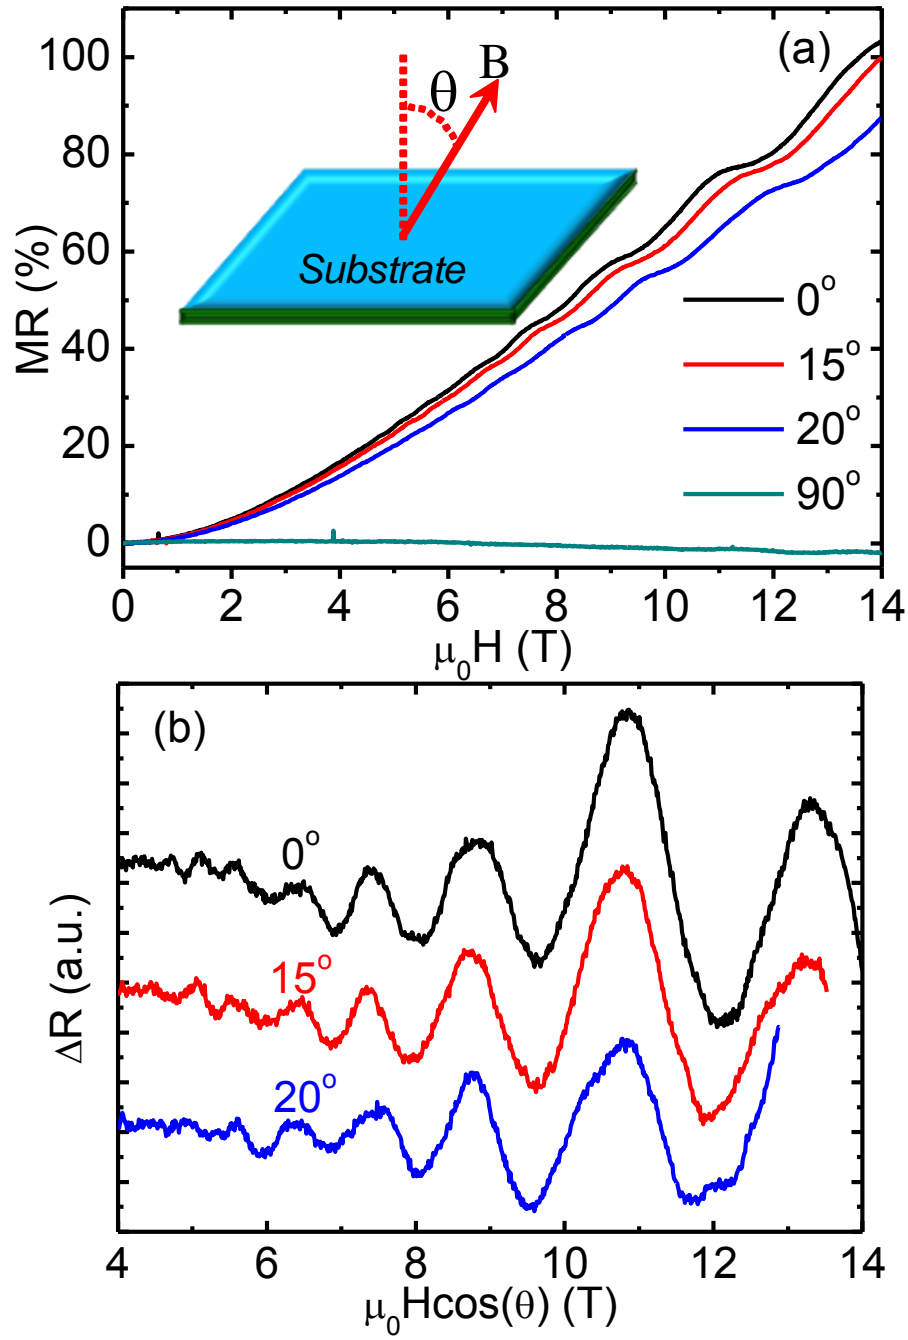

**Figure S8.** (a) The magnetoresistance measured at temperature of 1.5 K with different angles between the normal direction of the substrate plane and the direction of the magnetic field (see the sketch map in the inset). (b) The SdH oscillations in resistance as a function of the vertical component of the magnetic field.
